# Supplementary material for: Sensory Appeal and Routines Beat Health Messages and Visibility Enhancements: Mixed-Methods Analysis of a Choice-Architecture Intervention in a Workplace Cafeteria
Source: MDPI journal article supplement (doi:10.3390/nu14183731), 2022-09-10
Supplement: s1 [file s1]

## Supplementary material

Heart-food = food items that met the product category-specific nutrition criteria of the Heart symbol.

**Supplementary Table S1.** Objects of interest on serving line stretches #1–2. During the intervention, heart-food items featured Heart symbols that were considered objects of interest per se.

| Serving line | Weekday   | Category                           | Object of interest                                      | Heart-food       |
|--------------|-----------|------------------------------------|---------------------------------------------------------|------------------|
| Stretch #1   | all       | Heart-symbol material <sup>1</sup> | "Follow the heart"-poster (A3), front of pillar         | not applicable   |
|              | all       | Heart-symbol material <sup>1</sup> | Heart label on a salad bar notice (A4), front of pillar | not applicable   |
| Stretch #2   | all       | Heart-symbol material <sup>1</sup> | "A sign of good food"-poster (A3), back of pillar       | not applicable   |
|              | all       | Heart-symbol material <sup>1</sup> | Heart label on a salad bar notice (A4), back of pillar  | not applicable   |
|              | all       | Heart-symbol material <sup>1</sup> | Salad bar sign (A6) with Heart label, back of pillar    | not applicable   |
|              | all       | snack                              | Fruits                                                  | Yes              |
|              | all       | snack                              | Blueberry quark                                         | Yes              |
|              | all       | snack                              | Sandwiches                                              | No               |
|              | all       | snack                              | Yoghurts                                                | No               |
|              | all       | snack                              | Muesli bars                                             | No               |
|              | all       | snack                              | Nut and dried fruit mix                                 | No               |
|              | all       | salad bar                          | Salad components as a whole ( $n = 18-19$ per day)      | Yes <sup>2</sup> |
|              | all       | salad bar                          | Salad dressings                                         | Yes and no       |
|              | Monday    | warm course                        | Steamed vegetables                                      | Yes              |
|              | Monday    | warm course                        | Boiled potatoes                                         | No <sup>3</sup>  |
|              | Monday    | warm course                        | Wholegrain rice                                         | No <sup>3</sup>  |
|              | Monday    | warm course                        | Chicken rissoles                                        | Yes              |
|              | Monday    | warm course                        | Curry sauce for chicken rissoles                        | Yes              |
|              | Monday    | warm course                        | Bean and vegetable sauce                                | Yes              |
|              | Monday    | warm course                        | Pureed vegetable soup with cheese                       | Yes              |
|              | Monday    | warm course                        | Beef wok                                                | No               |
|              | Tuesday   | warm course                        | Steamed vegetables                                      | Yes              |
|              | Tuesday   | warm course                        | Boiled potatoes                                         | Yes              |
|              | Tuesday   | warm course                        | Beetroot croquettes                                     | Yes              |
|              | Tuesday   | warm course                        | Potato wedges                                           | No               |
|              | Tuesday   | warm course                        | Hamburgers                                              | No               |
|              | Tuesday   | condiment                          | Chilli-mayonnaise                                       | No               |
|              | Tuesday   | warm course                        | Salmon soup                                             | No <sup>4</sup>  |
|              | Tuesday   | dessert                            | Lingonberry quark                                       | No               |
|              | Wednesday | warm course                        | Steamed vegetables                                      | Yes              |
|              | Wednesday | warm course                        | Boiled potatoes                                         | Yes              |
|              | Wednesday | warm course                        | Wholegrain rice                                         | Yes              |
|              | Wednesday | warm course                        | Fish cutlets with Cheddar cheese                        | Yes              |
|              | Wednesday | condiment                          | Yoghurt dressing and lemon for fish                     | No               |
|              | Wednesday | warm course                        | Vegetarian curry                                        | Yes              |
|              | Wednesday | warm course                        | Chorizo casserole                                       | No               |
|              | Wednesday | warm course                        | Spinach soup and boiled eggs                            | No               |
|              | Thursday  | warm course                        | Steamed vegetables                                      | Yes              |
|              | Thursday  | warm course                        | Broad bean and pasta casserole                          | Yes              |
|              | Thursday  | warm course                        | Pureed sweet potato soup with chilli                    | Yes              |
|              | Thursday  | warm course                        | Mashed potatoes                                         | No               |
|              | Thursday  | warm course                        | Oven-baked sausages with grated cheese                  | No               |
|              | Thursday  | warm course                        | Chicken tortillas                                       | No               |
|              | Thursday  | condiment                          | Taco sauce for tortillas                                | No               |
|              | Thursday  | condiment                          | Salsa for tortillas                                     | No               |
|              | Thursday  | condiment                          | Sour cream for tortillas                                | No               |
|              | Thursday  | dessert                            | White chocolate mousse                                  | No               |
|              | Friday    | warm course                        | Steamed vegetables                                      | Yes              |
|              | Friday    | warm course                        | Boiled potatoes                                         | Yes              |
|              | Friday    | warm course                        | Fish sauce with lemon                                   | Yes              |
|              | Friday    | warm course                        | Vegetarian moussaka                                     | Yes              |
|              | Friday    | warm course                        | Beef burgers filled with pepper sauce                   | No               |
|              | Friday    | warm course/condiment              | Gravy/sour cream for beef burgers                       | No               |
|              | Friday    | warm course                        | Blue cheese soup                                        | No               |
|              | Friday    | dessert                            | Fruit salad and vanilla sauce                           | No               |

<sup>1</sup> In place only during intervention. <sup>2</sup> All salad components were considered heart-food items because the implementation of Heart labels and the analysis of eye-tracking data were not feasible at the level of individual salad components. <sup>3</sup> Boiled potatoes and wholegrain rice met the nutritional criteria of the Heart symbol but received no symbols on intervention week's Monday. Hence, on Mondays these foods were categorised as non-heart-foods and on other days as heart-foods. <sup>4</sup> Salmon soup met the criteria of the Heart symbol only during the control condition. Hence, the soup received no Heart symbol during intervention and was categorised as non-heart-food.

**Supplementary Table S2.** Definitions for the areas of interest (AoI) of the objects of interest on serving line stretches #1–2.

| Category                           | Object of interest                                                          | Area of interest                                                                                                                                                                                                                                                                                                                                                                                   |
|------------------------------------|-----------------------------------------------------------------------------|----------------------------------------------------------------------------------------------------------------------------------------------------------------------------------------------------------------------------------------------------------------------------------------------------------------------------------------------------------------------------------------------------|
| Heart-symbol material <sup>1</sup> | Posters, notices, stickers, and signs                                       | Outlines of Heart-symbol posters, notices, stickers, or signs added on the serving line                                                                                                                                                                                                                                                                                                            |
| Snack                              | Fruit                                                                       | Outlines of fruit and their serving platter                                                                                                                                                                                                                                                                                                                                                        |
| Snack                              | Sandwiches, blueberry quark, yoghurts, muesli bars, nut and dried fruit mix | Outlines of food packages, including possible serving platters                                                                                                                                                                                                                                                                                                                                     |
| Salad bar                          | Salad components                                                            | Combined outlines of the serving dishes of available salad components, including spaces between adjacent serving dishes. These outlines defined the AoI also when the serving dishes had only little food left and the bottoms and/or insides of the dishes were exposed. If food items rose above the tops of the serving dishes, the foods themselves defined the top of the AoI.                |
| Salad bar                          | Salad dressings                                                             | Outlines of salad dressing bottle.                                                                                                                                                                                                                                                                                                                                                                 |
| Warm course                        | Warm courses                                                                | Outlines of the serving dishes of individual warm course items, excluding lids and hoods and spaces between adjacent serving dishes. These outlines defined the AoIs also when the serving dishes had only little food left and the bottoms and/or insides of the dishes were exposed. If food items rose above the tops of the serving dishes, the foods themselves defined the tops of the AoIs. |
| Condiment                          | Sauces for warm courses                                                     | Outlines of serving dishes                                                                                                                                                                                                                                                                                                                                                                         |
| Dessert                            | Dessert items                                                               | Outlines of serving dishes                                                                                                                                                                                                                                                                                                                                                                         |

<sup>1</sup> In place only during intervention.

**Supplementary Table S3.** Perceived influences on food choices with example quotes from interview data. The influences are presented in a descending order according to the total number of individuals that mentioned each influence.

| Influence        | Description                                                                                                                                                                                                             | Example quotes                                                                                                                                                                                                                                                                                                                      |
|------------------|-------------------------------------------------------------------------------------------------------------------------------------------------------------------------------------------------------------------------|-------------------------------------------------------------------------------------------------------------------------------------------------------------------------------------------------------------------------------------------------------------------------------------------------------------------------------------|
| Sensory appeal   | The look, taste, or texture of food; less-specified preferences                                                                                                                                                         | The appearance of food; attractiveness matters.<br>Mental image of flavour. If there is a choice after that, I choose the healthier option. Flavour is nevertheless the most important thing.<br>Rye bread is important, but if it is too hard, I don't take it.<br>Other options were not pleasant.                                |
| Healthiness      | Healthiness in general, meal composition, nutritional content, specific dietary guidelines, the Heart symbol                                                                                                            | Healthiness.<br>That there are vegetable, protein, and carbohydrate sources to form a healthy plate model.<br>Rich in protein.<br>I aim to eat fish when it is available, due to guidelines.<br>Sometimes I use the Heart symbol to support my choices. For example, now I took milk instead of juice due to the Heart symbol.      |
| Familiarity      | Habitual, familiar, or traditional choices                                                                                                                                                                              | What I chose is basic food I usually eat.<br>Tortillas have not always been very good. I considered this a safer choice.<br>I prefer rather traditional foods.                                                                                                                                                                      |
| Particular foods | Particular food, food group, or meal component                                                                                                                                                                          | Salad table, fresh produce.<br>I favour fish when it's available.                                                                                                                                                                                                                                                                   |
| Variation        | The importance of having a wide variety of options to choose from, desire to choose diverse foods or foods different to those eaten elsewhere, curiosity to try new foods, motivation towards specialties rarely served | Variety; that there are diverse options.<br>A balanced meal.<br>No red meat, I eat it otherwise so much that I try to avoid it.<br>Seemed interesting. What is mifu ( <i>a dairy-based meat alternative</i> ) like?<br>Rarely served. I planned to have salad but noticed the hamburgers and changed my mind in the nick of time.   |
| Weight control   | Weight management, lightness, conscious regulation of portion sizes                                                                                                                                                     | I look at what I eat in relation to ( <i>energy</i> ) consumption. With heavy workout, it's ok to eat more heavily.<br>That the food is not very fatty.<br>I may have taken a bit too much of the carbohydrate accompaniment, I paid attention to that after portioning. I considered whether to take two fish cutlets. I took one. |
| Menu             | The menu online or at the restaurant.                                                                                                                                                                                   | I checked the menu at the entrance and practically made my decision there. I still compared the main courses at the serving line, yet kept my original choice.                                                                                                                                                                      |

| Influence        | Description                                                                                   | Example quotes                                                                                                                                                                                                                            |
|------------------|-----------------------------------------------------------------------------------------------|-------------------------------------------------------------------------------------------------------------------------------------------------------------------------------------------------------------------------------------------|
| Satiety          | Foods that fill the stomach and take away the hunger                                          | That the food is filling.<br>I often take the Heart label option but chose sausage today because I'm very hungry.                                                                                                                         |
| Mood             | Foods that help to cope with work/personal life commitments, choices made based on a feeling. | I try to choose a fairly light lunch that doesn't make me tired in the afternoon.<br>Soup would have been enough, but I have a long and physically active day ahead.<br>( <i>I made my choice</i> ) based on vibes, what I fancied today. |
| Special diet     | Special dietary requirements                                                                  | I need gluten free food.<br>I'm a vegetarian.                                                                                                                                                                                             |
| Food quality     | The type of food or ingredients                                                               | The quality of food.<br>On the bread table, ( <i>I checked</i> ) whether there was fresh bread.                                                                                                                                           |
| Convenience      | Focus on time needed to acquire or eat food.                                                  | ( <i>It is important</i> ) to get the food rather quickly.<br>( <i>I made my choice</i> ) based on which food is quick to eat.                                                                                                            |
| Price            | Affordable prices, price-quality ratio                                                        | Affordable price is important as well as getting healthy food at a reasonable price.<br>Price-quality ratio.                                                                                                                              |
| Season           | New Years' resolutions, weather outside                                                       | The choice was based on a New Year's lifestyle change; the proportion of salad is greater than before.<br>The soup was tempting due to the cold weather.                                                                                  |
| Social influence | Recommendations of the cafeteria staff, experiences of other customers                        | Sometimes I ask recommendations from the restaurant staff.<br>I happened to hear that the steaks are very peppery. That's why I chose the fish.                                                                                           |
| Natural content  | Processing                                                                                    | In principle, I do not eat highly processed food.                                                                                                                                                                                         |
| Ethical concern  | Food origin                                                                                   | With the side dish, I pay attention to whether it is local.                                                                                                                                                                               |
